# Supplementary material for: Expression of Adipocyte/Macrophage Fatty Acid–Binding Protein in Tumor-Associated Macrophages Promotes Breast Cancer Progression
Source: Oxford University Press journal article supplement (doi:10.1158/0008-5472.can-17-2465), 2018-02-06
Supplement: 00085472can172465-sup-187857_3_supp_4531406_p36fzp.docx [file 00085472can172465-sup-187857_3_supp_4531406_p36fzp.docx]

**
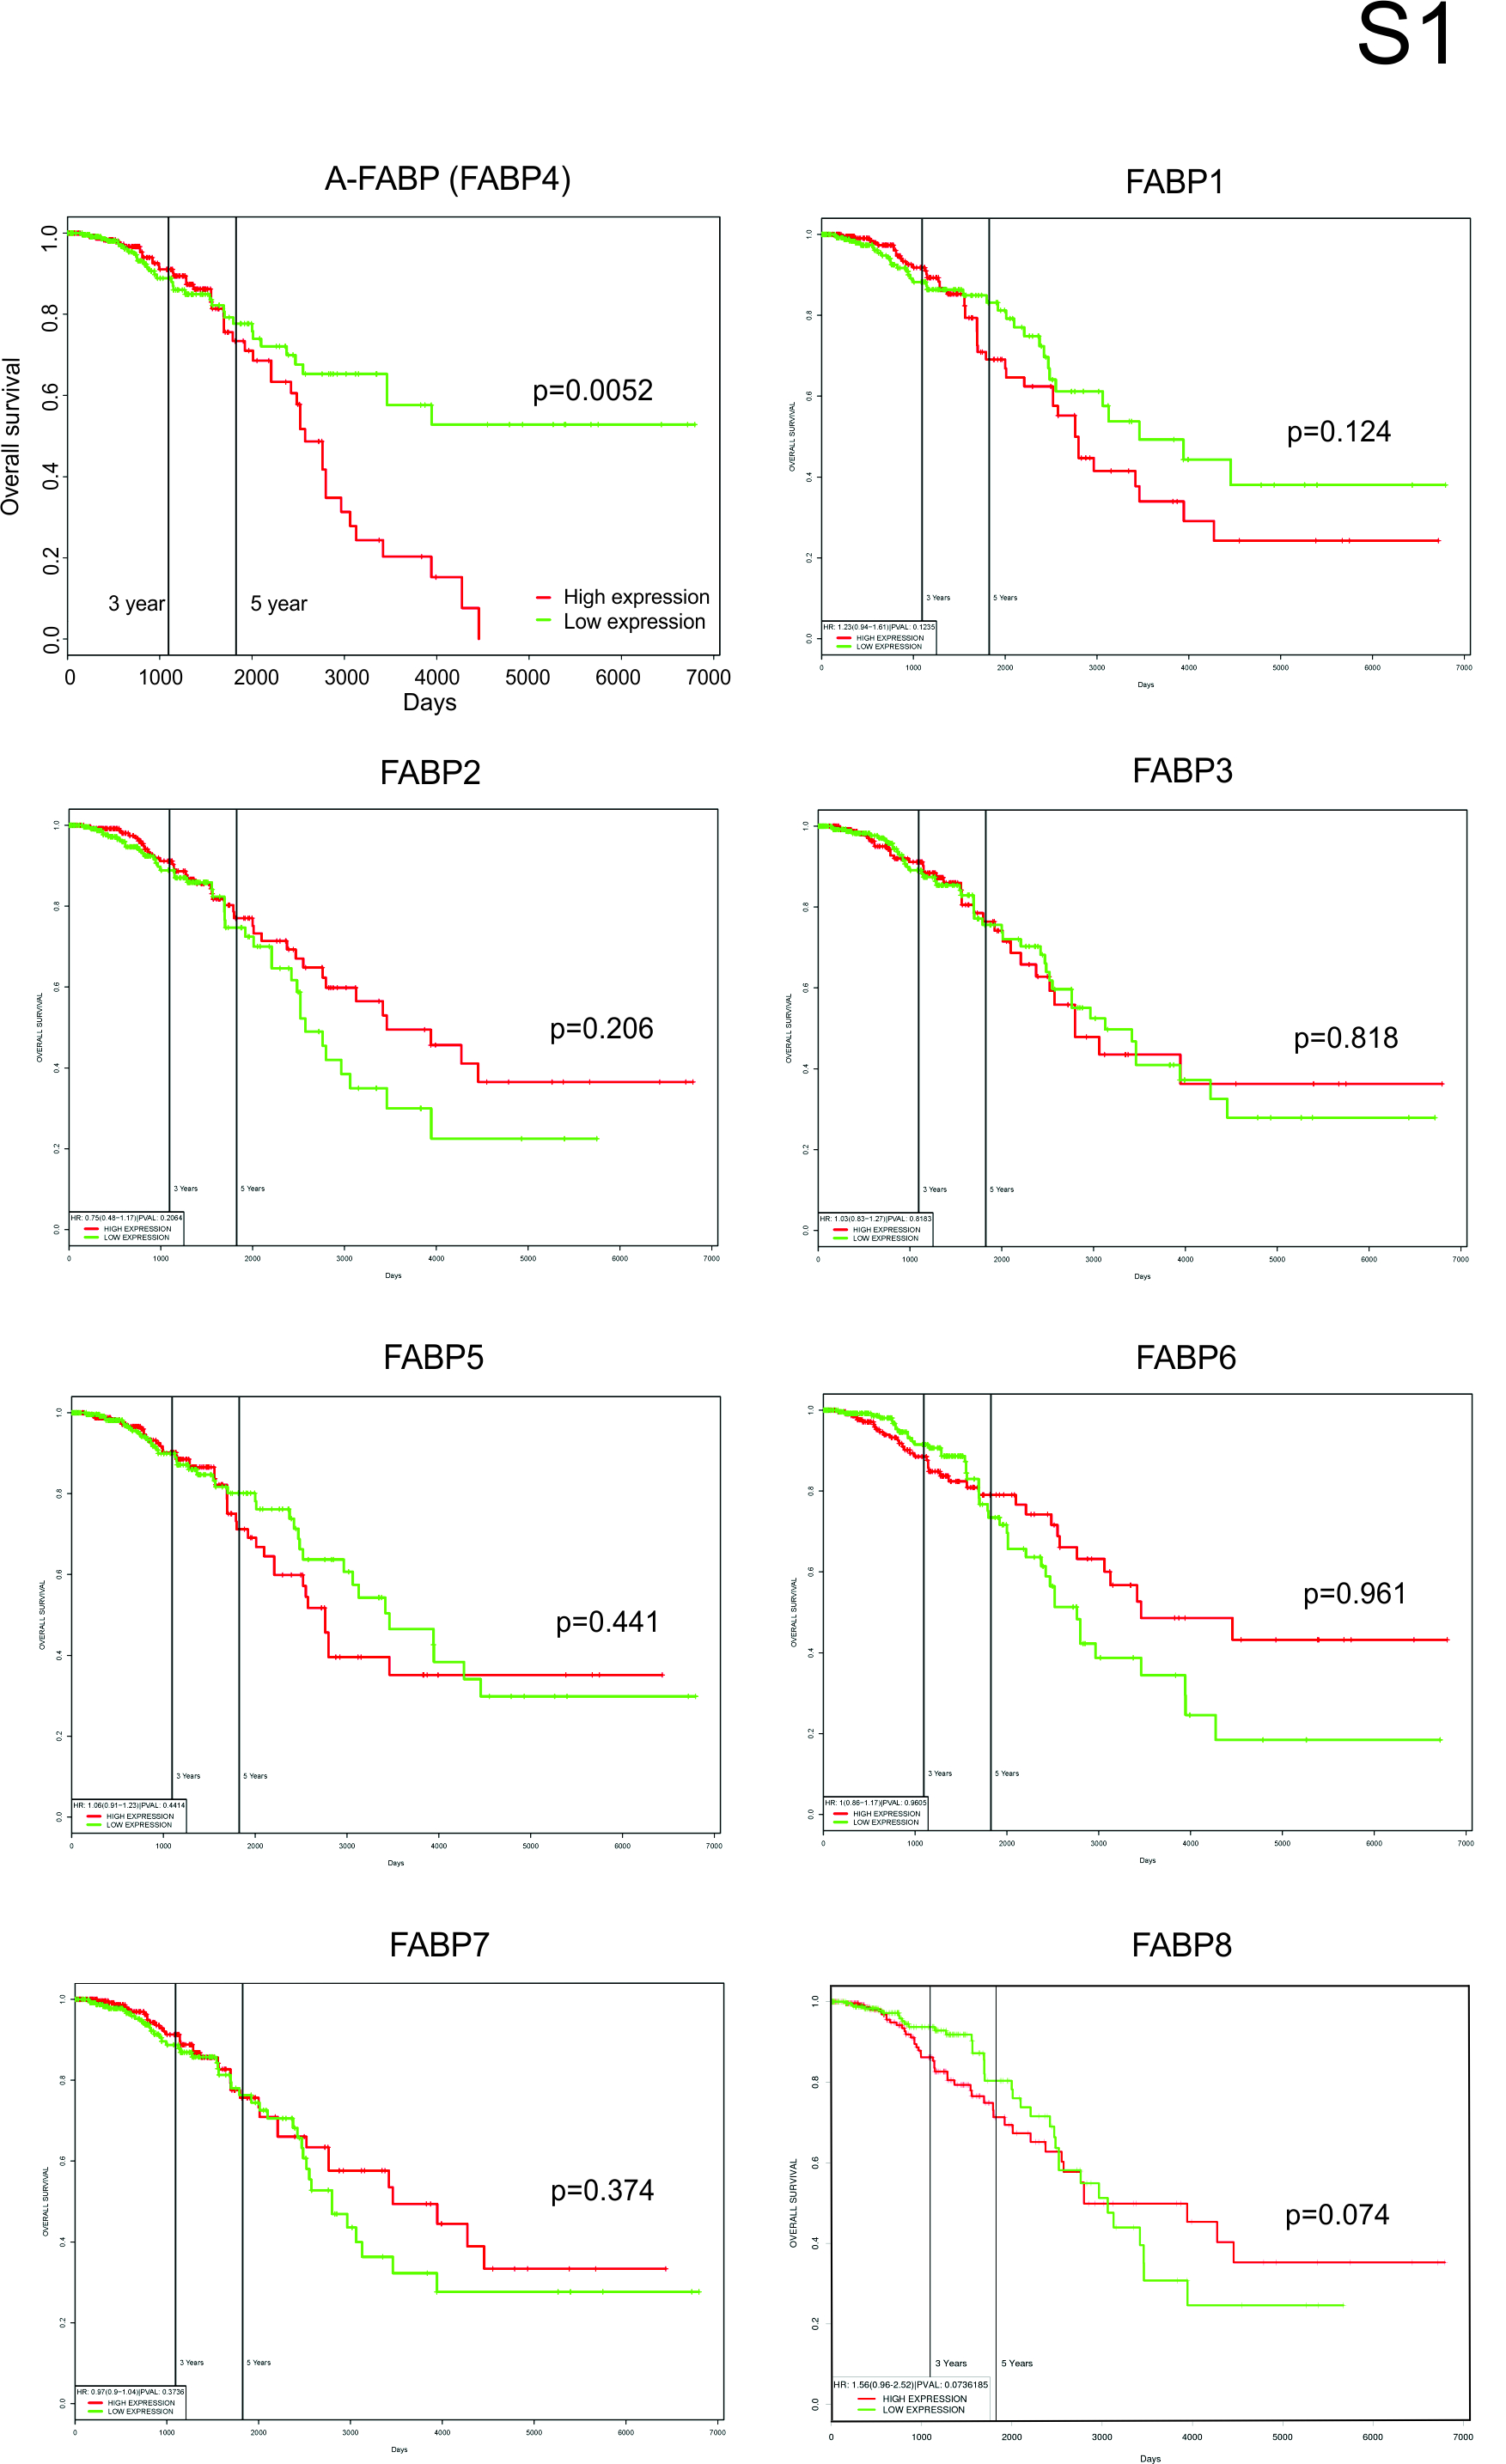
**

**Supplementary Figure 1 PROGgene analysis of association of FABP family members with overall survival of breast cancer patients using TCGA breast cancer dataset.** Samples in the top 50% of FABP expression were defined as high expressers (red line). Low expressers were shown in green line.


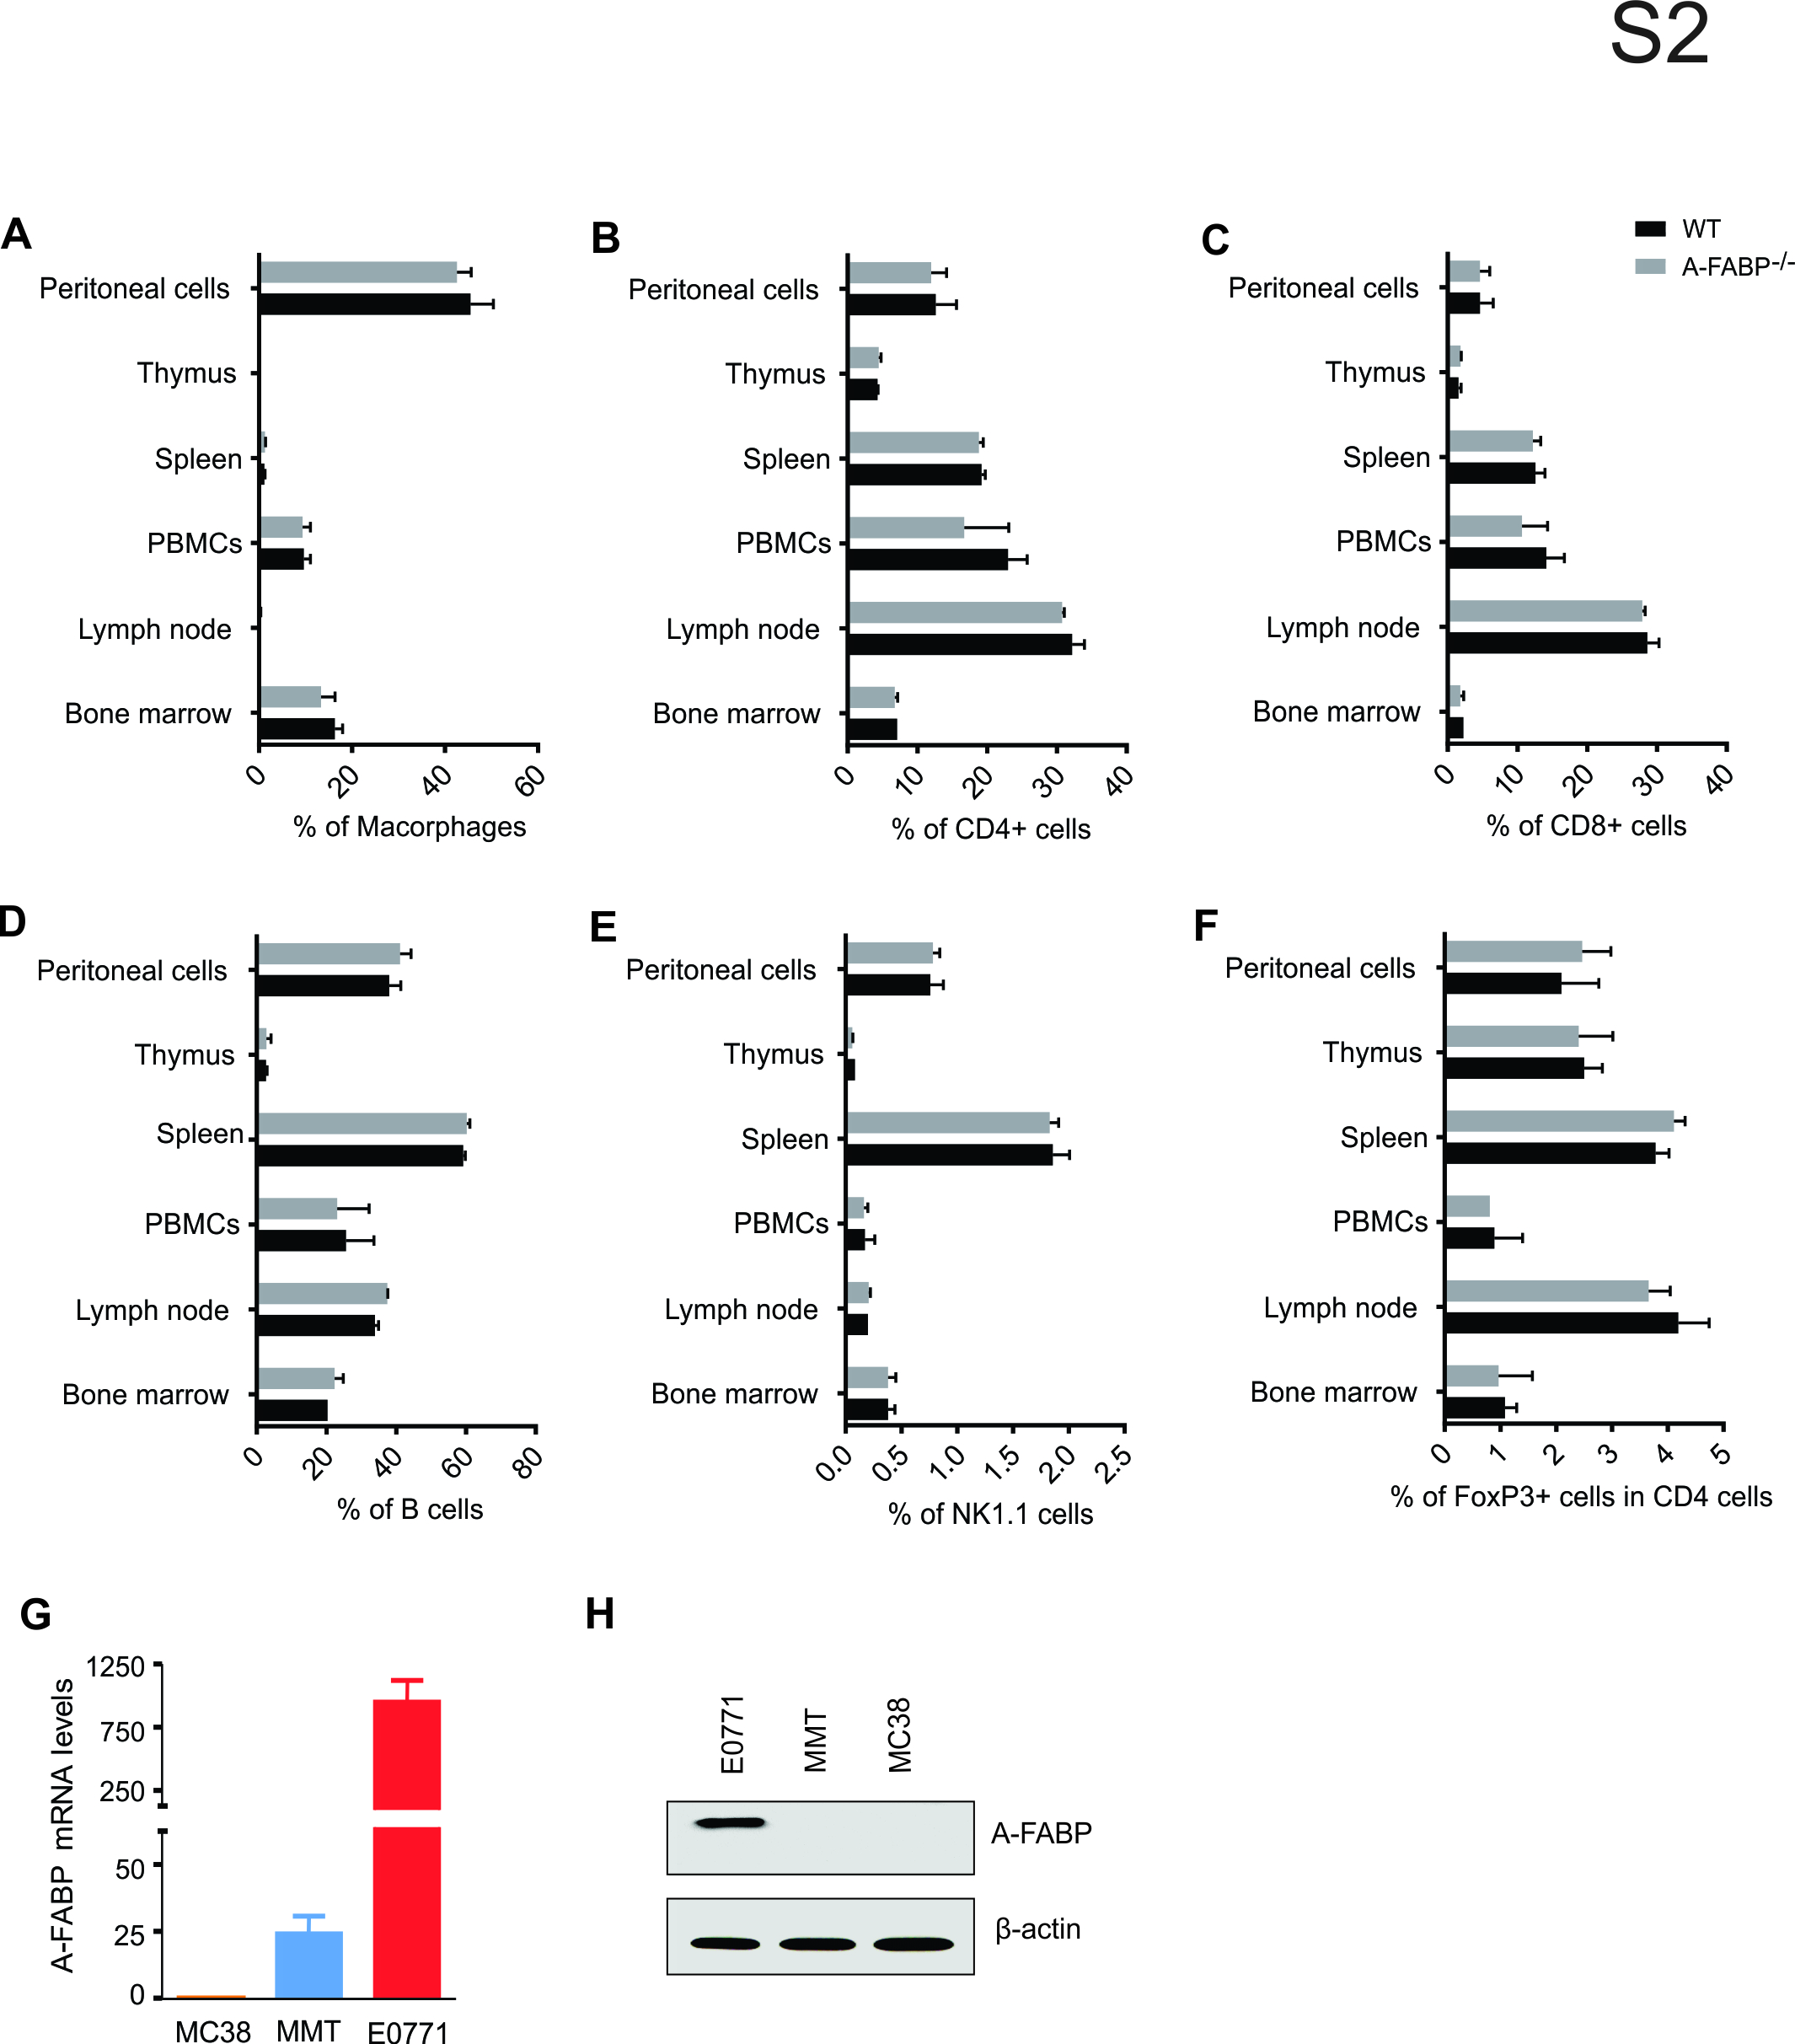


**Supplementary Figure 2 Analyses of immunophenotype of naïve WT and A-FABP-/- mice and A-FABP expression in different tumor cells. (A-F)** Comparison of the percentage of different immune cells in naïve WT and A-FABP-/- mice by flow cytometric surface staining. **(G-H)** Analysis of A-FABP expression by real-time PCR (**G**) and Western blotting (**H**) in the indicated tumor cells. β-actin was used as a loading control.
