# Supplementary material for: Expression of Adipocyte/Macrophage Fatty Acid–Binding Protein in Tumor-Associated Macrophages Promotes Breast Cancer Progression
Source: Oxford University Press journal article supplement (doi:10.1158/0008-5472.can-17-2465), 2018-02-06
Supplement: 00085472can172465-sup-187857_3_supp_4531410_p36fzp.docx [file 00085472can172465-sup-187857_3_supp_4531410_p36fzp.docx]

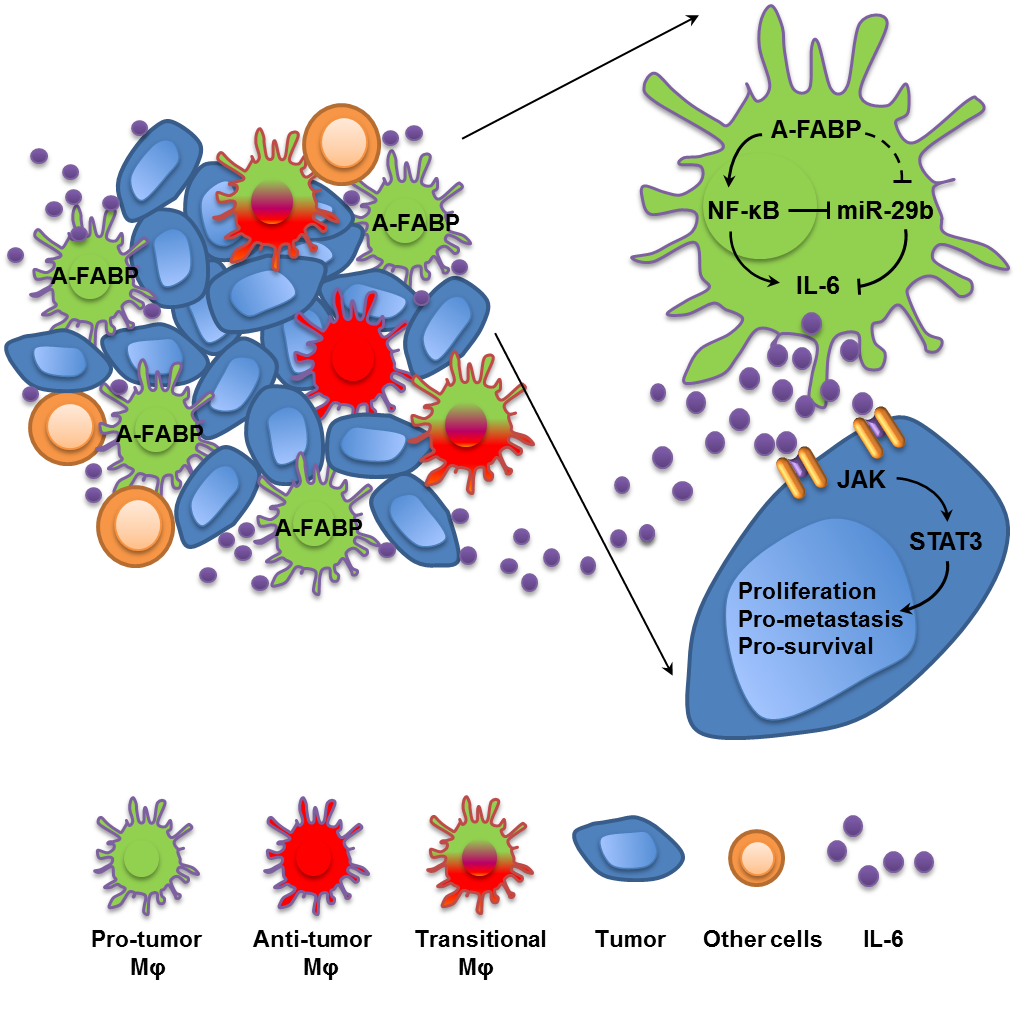


**Supplementary Figure 9 A-FABP is a new functional maker for pro-tumor macrophages**

Tumor stroma contains heterogeneous macrophages with different phenotype and function, among which A-FABP is highly expressed in the subset of CD11b+F4/80+MHCII-Ly6C- promoting mammary tumor growth and metastasis through NFκB/miR-29b/IL-6 pathway. Thus, A-FABP represents a new functional marker for pro-tumor macrophages and a novel target for macrophage-based tumor immunotherapy.
