# Supplementary material for: Expression of Adipocyte/Macrophage Fatty Acid–Binding Protein in Tumor-Associated Macrophages Promotes Breast Cancer Progression
Source: Oxford University Press journal article supplement (doi:10.1158/0008-5472.can-17-2465), 2018-02-06
Supplement: 00085472can172465-sup-187857_3_supp_4531412_p3dvvn.docx [file 00085472can172465-sup-187857_3_supp_4531412_p3dvvn.docx]

**Supplementary Table 1**

**Sequences of siRNAs, PCR primers and miRs used in experiments**

|  | **Name** |  | **Oligo sequences (5’ to 3’)** |
| --- | --- | --- | --- |
| siRNA | *NFκB* siRNA and scramble | siRNA1 | CCAUCAAGAUCAAUGGCUACACAGG |
| siRNA2 | GCAUCAUGAAGAAGAGUCCUUUCAG |
| siRNA3 | AGAGGACAUUGAGGUGUAUUUCACG |
| scramble | GAUUCUCCGAACGUGUCACGUTT |
| qPCR | *A-FABP* | forward | TTTCCTTCAAACTGGGCGTG |
| reverse | CATTCCACCACCAGCTTGTC |
| *E-FABP* | forward | AACCGAGAGCACAGTGAAG |
| reverse | ACACTCCACGATCATCTTCC |
| *Arg-1* | forward | TCACCTGAGCTTTGATGTCG |
| reverse | TTATGGTTACCCTCCCGTTG |
| *iNOS* | forward | GCTTCTGGTCGATGTCATGAG |
| reverse | TCCACCAGGAGATGTTGAAC |
| *CXCR1* | forward | TCTGGACTAATCCTGAGGGTG |
| reverse | GCCTGTTGGTTATTGGAACTCTC |
| *IL-12* | forward | CCTCAGTTTGGCCAGGGTC |
| reverse | CAGGTTTCGGGACTGGCTAAG |
| *IL-6* | forward | ACCTGTCTATACCACTTC |
| reverse | GCATCATCGTTGTTCATA |
| *m18S* | forward | ACAGGATTGACAGATTGA |
| reverse | TATCGGAATTAACCAGACA |
| *HPRT1* | forward | AGCCTAAGATGAGCGCAAGT |
| reverse | TTACTAGGCAGATGGCCACA |
| *β-actin* | forward | GGCTGTATTCCCCTCCATCG |
| reverse | CCAGTTGGTAACAATGCCATGT |
| *MMP1* | forward | Qiagen RT2 qPCR Primer Set |
| reverse |
| *MMP-9* | forward | Qiagen RT2 qPCR Primer Set |
| reverse |
| *TGF-β* | forward | Qiagen RT2 qPCR Primer Set |
| reverse |
| *IL-10* | forward | Qiagen RT2 qPCR Primer Set |
| reverse |
| *TNFα* | forward | Qiagen RT2 qPCR Primer Set |
| reverse |
| miR | *miR-29b and scramble* | miR-29b-3p | UAGCACCAUUUGAAAUCAGUGUU |
| scramble | miRIDIAN microRNA Mimic Negative Control #1 |
