# Supplementary material for: Expression of Adipocyte/Macrophage Fatty Acid–Binding Protein in Tumor-Associated Macrophages Promotes Breast Cancer Progression
Source: Oxford University Press journal article supplement (doi:10.1158/0008-5472.can-17-2465), 2018-02-06
Supplement: 00085472can172465-sup-187857_3_supp_4531421_p36fzp.docx [file 00085472can172465-sup-187857_3_supp_4531421_p36fzp.docx]

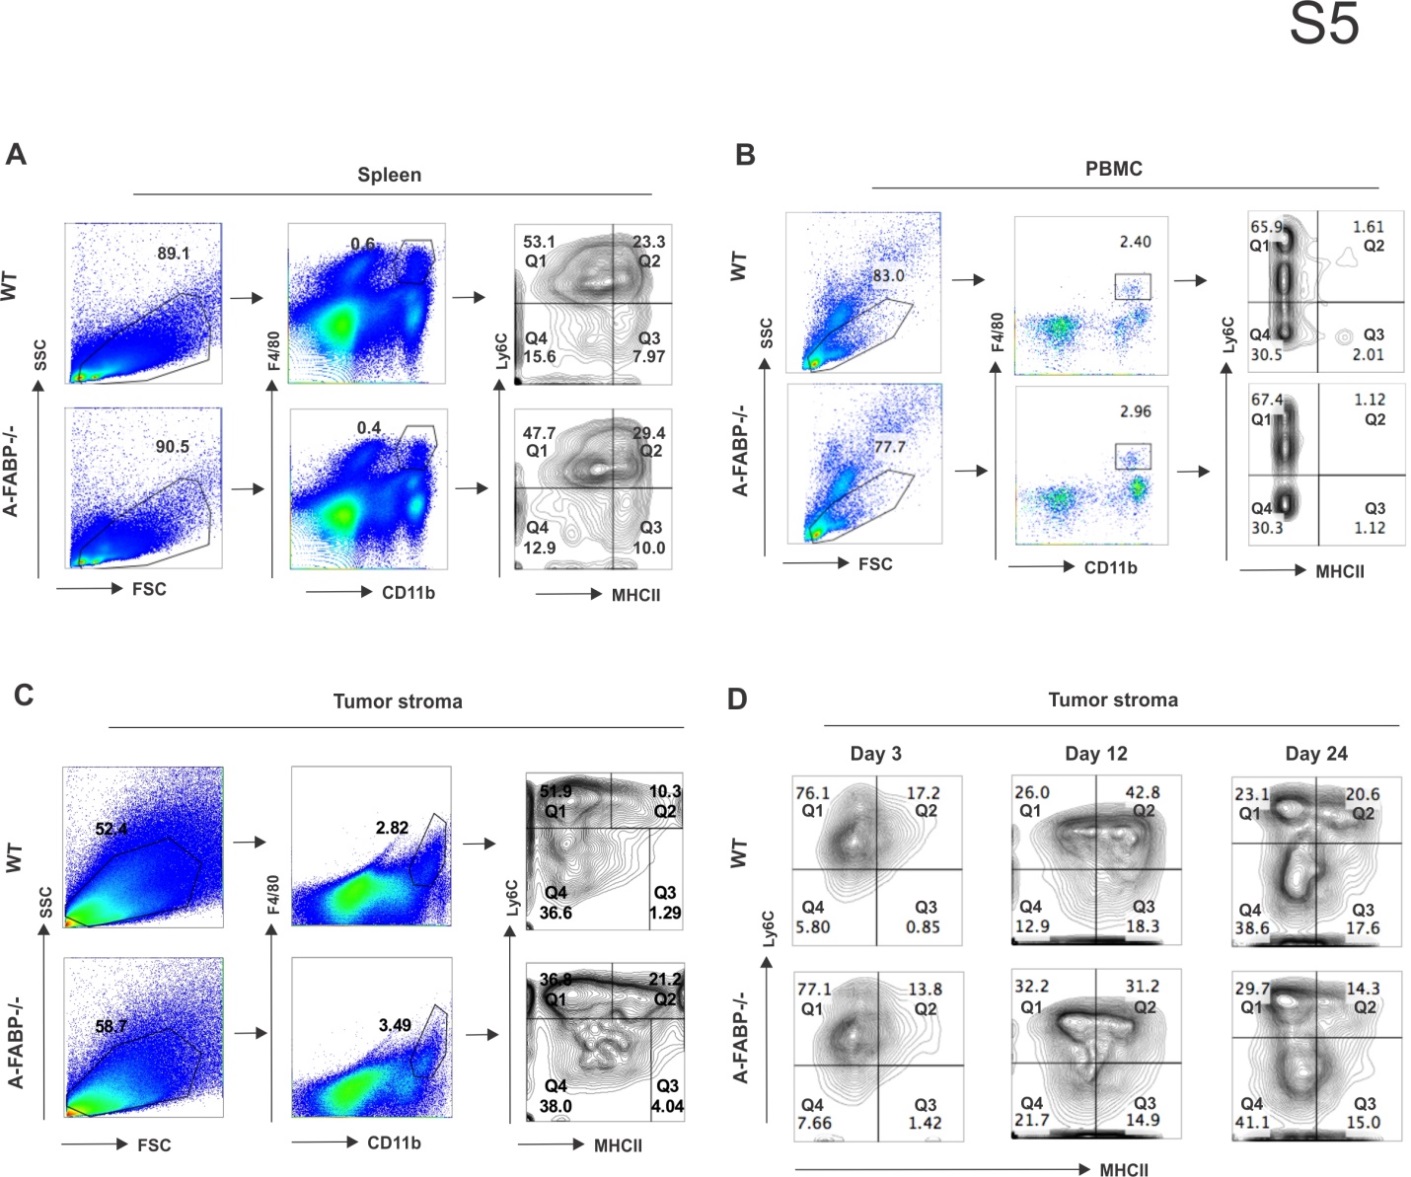


**Supplementary Figure 5 Analysis of distinct subsets of macrophages in WT and A-FABP-/- mice. (A)** Flow cytometric analysis of distinct macrophage subsets in the spleen of naïve WT and A-FABP-/- mice. **(B)** Flow cytometric analysis of distinct macrophage subsets in the peripheral blood of naïve WT and A-FABP-/- mice. **(C)** Flow cytometric analysis of distinct macrophage subsets in the E0771 tumor stroma from WT and A-FABP-/- mice. **(D)** Dynamic analysis of distinct subsets of TAM in the tumor stroma of WT and A-FABP-/- mice after E0771 cell implantation at the indicated time points.

**
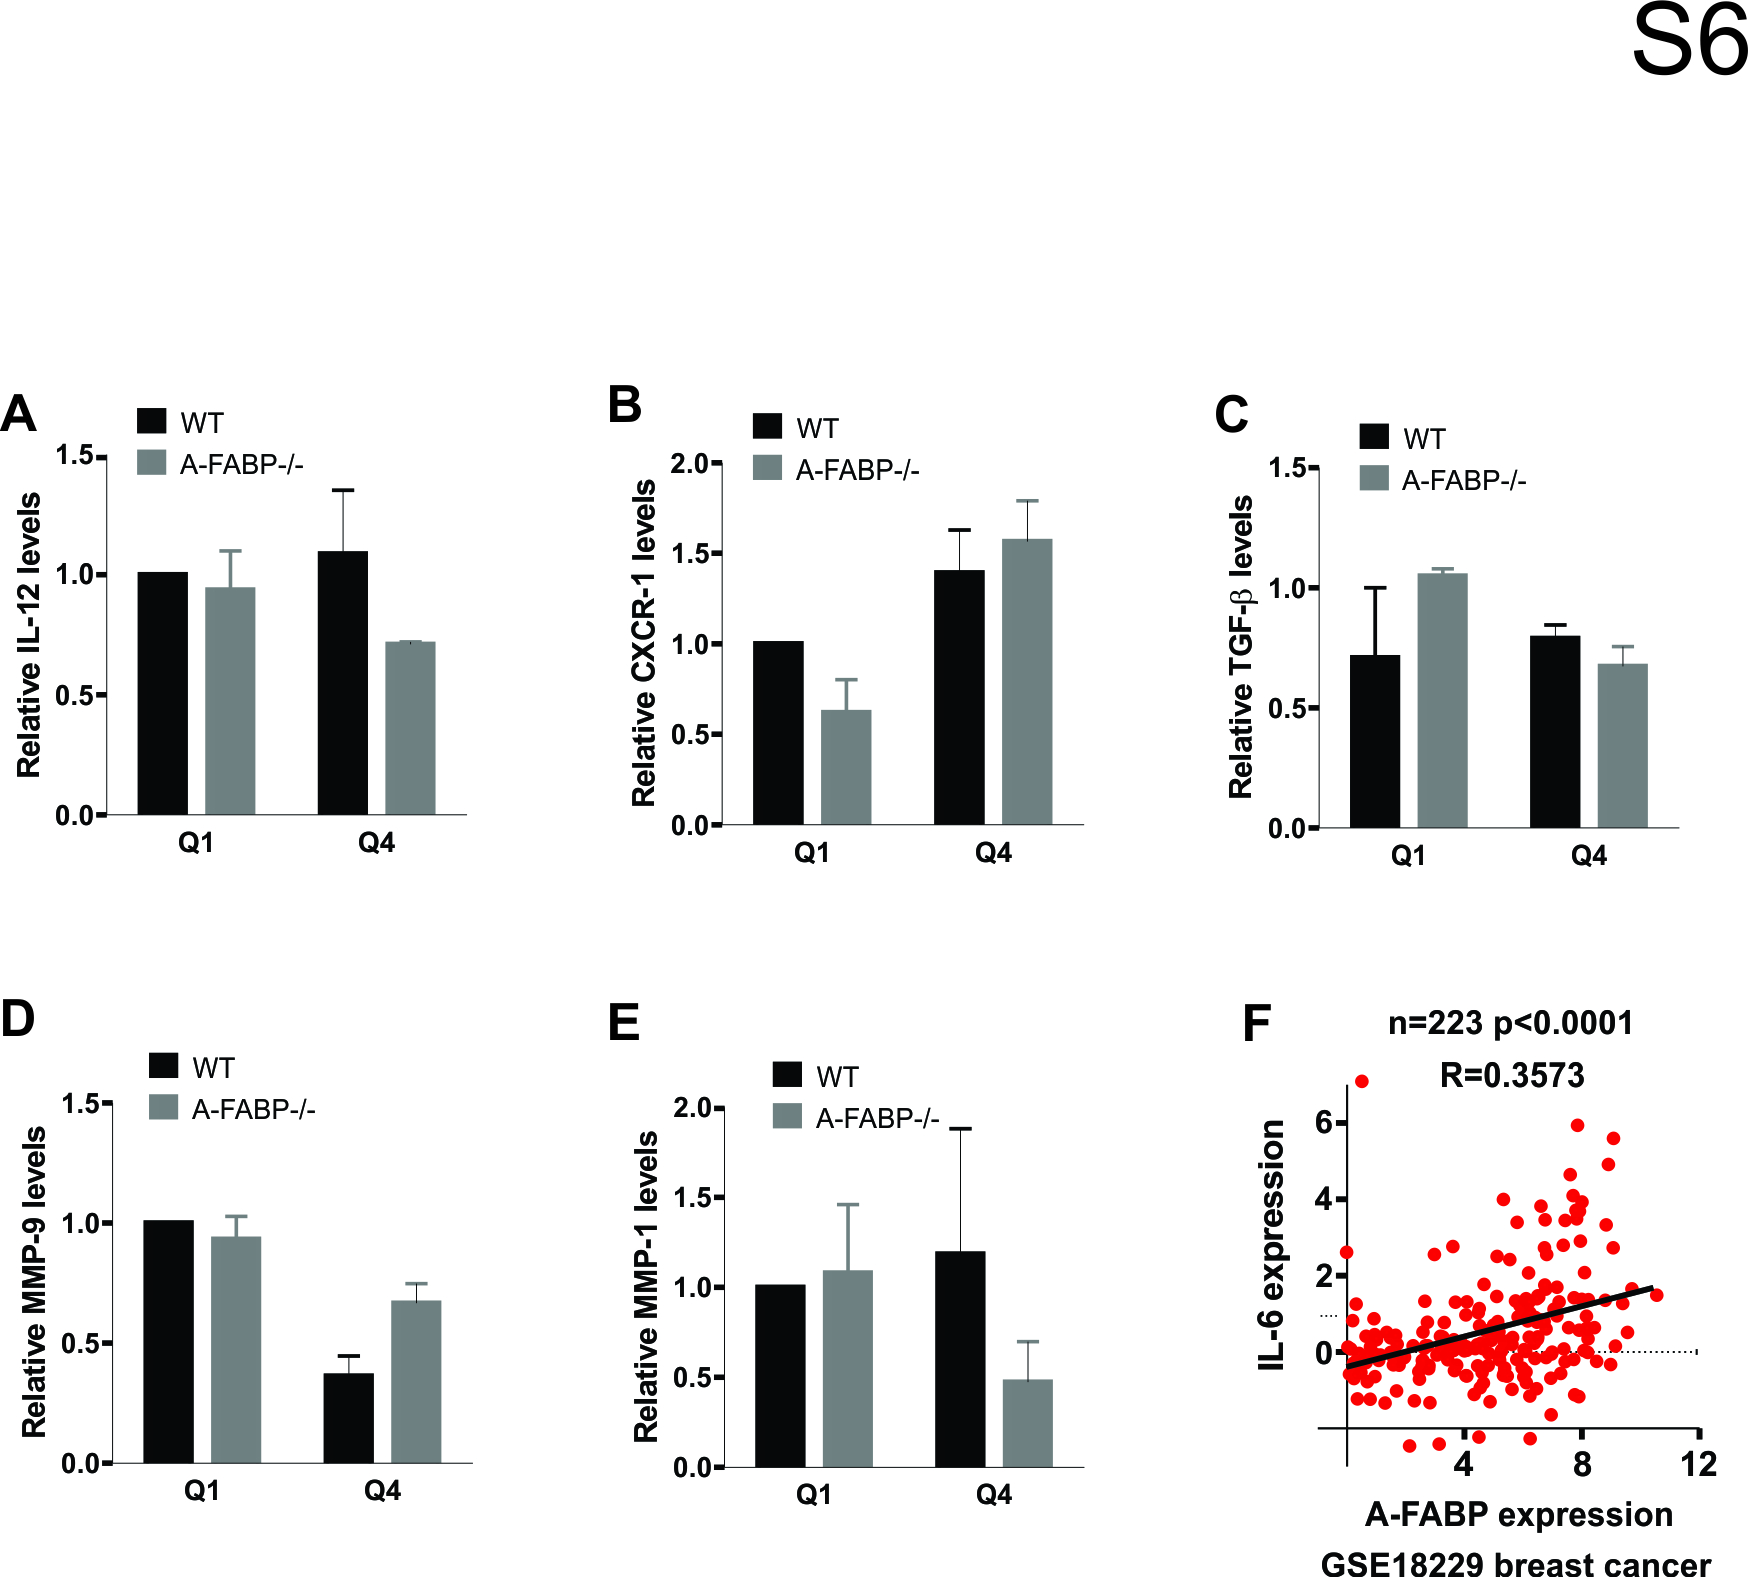
**

**Supplementary Figure 6 Analyses of the impact of A-FABP on cytokine expression**

**(A-E)** Analyses of the expression of IL-12 (A), CXCR-1 (B), TGF-β (C), MMP-9 (D) and MMP-1 (E) in the major subset of TAM separated from the tumor stroma of WT and A-FABP-/- mice by real-time PCR. **(F)** Correlation analysis of A-FABP with IL-6 in the breast cancer dataset GSE18229 (n=223, p<0.0001).
